# Supplementary material
Source: publisher figshare collection journal article supplement (https://acs.figshare.com/ndownloader/files/15543620)
Supplement: Supplementary file 1 [file 15543620]

## Supplementary material

**Familial L723P mutation can shift the distribution between the alternative APP transmembrane domain cleavage cascades by local unfolding of the  $\varepsilon$ -cleavage site suggesting a straightforward mechanism of Alzheimer's disease pathogenesis**

**Eduard V. Bocharov<sup>1,2\*</sup>, Kirill D. Nadezhdin<sup>1,2</sup>, Anatoly S. Urban<sup>1,2</sup>, Pavel E. Volynsky<sup>1</sup>, Konstantin V. Pavlov<sup>3</sup>, Roman G. Efremov<sup>1,2,4</sup>, Alexander S. Arseniev<sup>1,2</sup>, Olga V. Bocharova<sup>1,2</sup>**

<sup>1</sup> Shemyakin–Ovchinnikov Institute of Bioorganic Chemistry RAS, Moscow, Russian Federation;

<sup>2</sup> Moscow Institute of Physics and Technology, Dolgoprudnyi, Russian Federation;

<sup>3</sup> Federal clinical center of physical-chemical medicine of FMBA, Moscow, Russian Federation;

<sup>4</sup> National Research University Higher School of Economics, Moscow, Russian Federation.

\* Correspondence: [bon@nmr.ru](mailto:bon@nmr.ru)

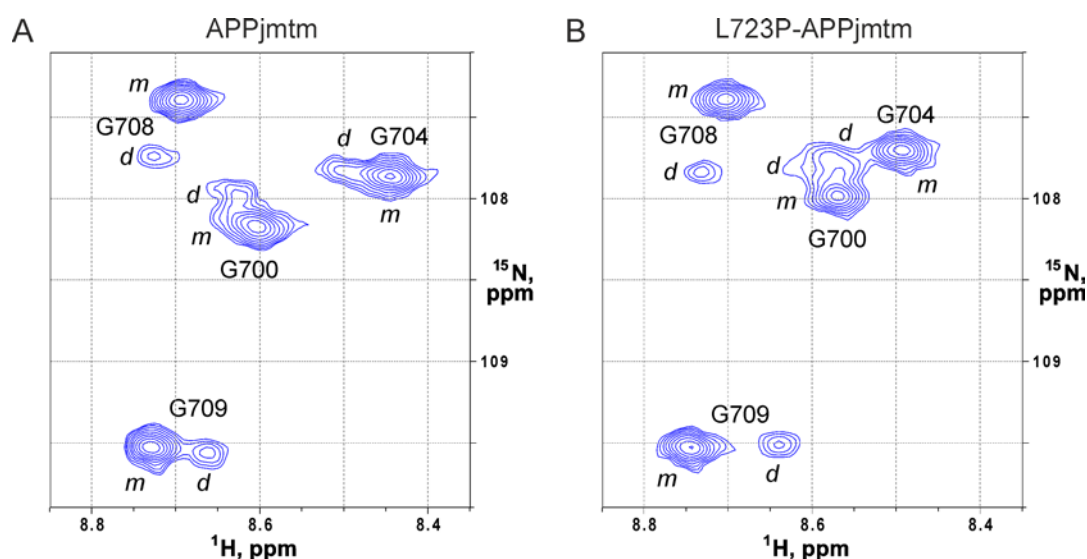

**Supplementary Figure S1. Comparison of the  $^1\text{H}$ - $^{15}\text{N}$  signal doubling of TM glycine amide groups upon dimerization of the wild-type APPjmtm peptide and its L723P mutant in the micellar environment.** Fragments of the heteronuclear  $^1\text{H}/^{15}\text{N}$ -HSQC NMR spectra acquired for fresh samples of APPjmtm (A) and L723P-APPjmtm (B) embedded into the DPC micelles at peptide/detergent ratio (P/D) of 1/110, 318 K and pH 6.9. The  $^1\text{H}$ - $^{15}\text{N}$  backbone resonance assignments of the amide groups of the glycine residues situated in the APP TM domain are shown. In both cases the APP TM domain undergoes a slow monomer-dimer transition, as proved by the appearance of P/D-dependent signal doubling in the NMR spectra of APPjmtm (ref. 13). The cross-peaks corresponding to the monomeric and dimeric states are marked by 'm' and 'd', respectively. The pattern of chemical shift changes of the mutant upon dimerization is similar to that of the wild type APPjmtm.

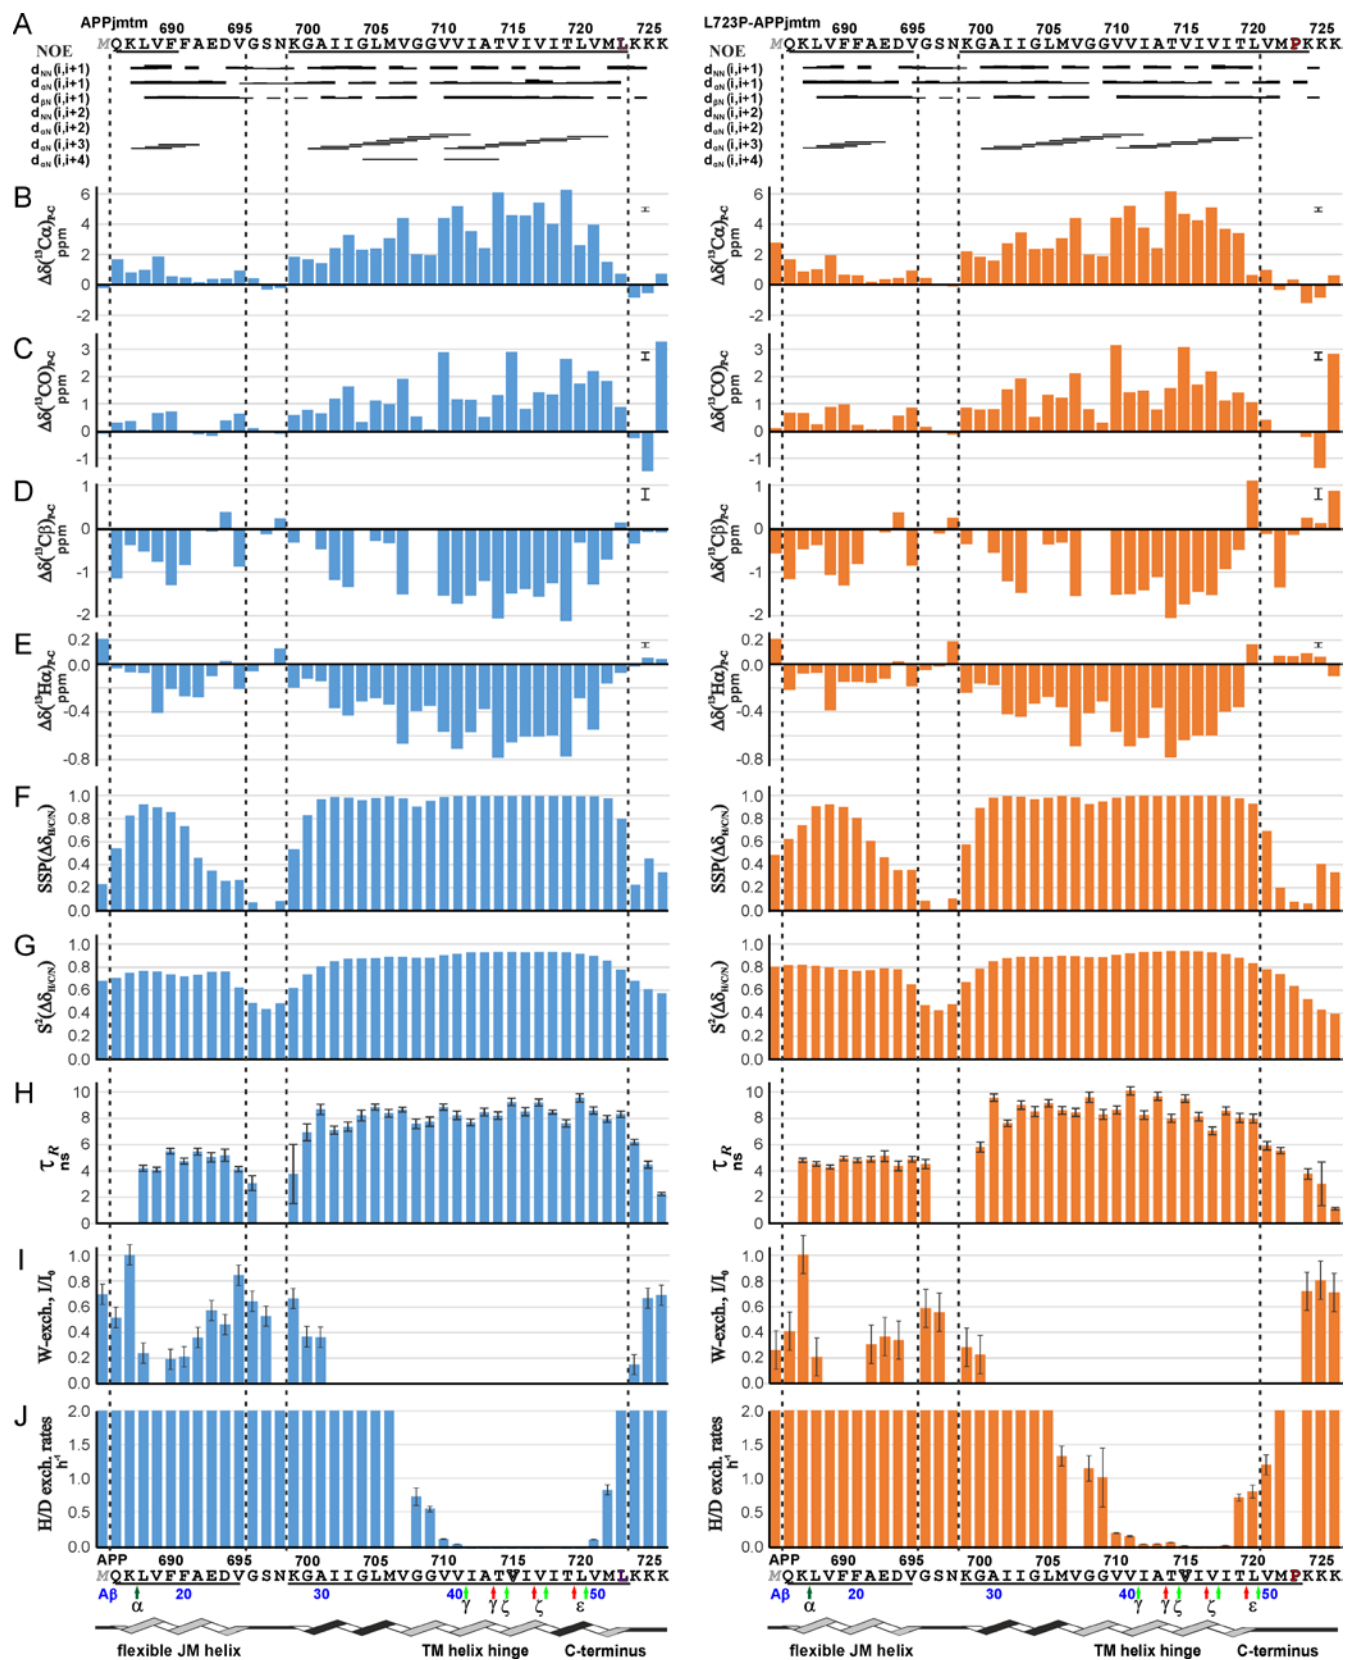

**Supplementary Figure S2. Summary of the structural-dynamic NMR data for the wild-type APPjmtm peptide (in left) and its L723P mutant (in right) in the micellar environment.** (A), Sequential and medium range  $^1\text{H}$ - $^1\text{H}$  NOE connectivities observed in 3D  $^{15}\text{N}$ -edited NOESY-HSQC spectra (80 ms mixing time) are shown by horizontal lines. The absence of the  $d_{\alpha\text{N}}(i, i+3)$  connectivity between residues T719 and M722 of L723P-APPjmtm indicates unfolding of the last turn of APP TM helix. (B-E), Secondary  $^{13}\text{C}\alpha$ ,  $^{13}\text{CO}$ ,  $^{13}\text{C}\beta$  and  $^1\text{H}\alpha$  chemical shifts are given as the difference between the actual chemical shift and the typical random-coil chemical shift for the given residue. Substantially positive  $\Delta\delta(^{13}\text{C}\alpha)_{\text{P-C}}$  and  $\Delta\delta(^{13}\text{CO})_{\text{P-C}}$  values, as well as negative  $\Delta\delta(^{13}\text{C}\beta)_{\text{P-C}}$  and  $\Delta\delta(^1\text{H}\alpha)_{\text{P-C}}$  values are indicative of the helical structure of both peptides. Uncertainties are shown by bars in the upper right corners. (F) and (G), The secondary structure probabilities (SSP) and local order parameters  $S^2$  derived from  $^1\text{H}$ ,  $^{13}\text{C}$  and  $^{15}\text{N}$  chemical shifts using the TALOS-N software, respectively, illustrate the helical structure distribution and its stability (on the ps-ns and possibly higher timescales) along the sequence of the peptides. (H) The  $^{15}\text{N}$ -relaxation data of the amide groups of the peptides are presented as local rotation correlation times ( $\tau_R$ ) estimated from  $^{15}\text{N}$  CSA/dipolar cross-correlated transverse relaxation. The uncertainties are shown by bars. Smaller relaxation times correspond to higher backbone flexibility. (I) Accessibility of the peptide residues to water assessed using CLEANEX experiment, which reveals the backbone amide protons undergoing rapid exchange with water. The uncertainties are shown by bars. (J) H/D exchange rates of the backbone amide protons of the peptides are plotted, revealing slow processes of exchange with water. Fast exchange rates above  $2\text{ h}^{-1}$  for N- and C-terminal residues could not be properly detected due to finite reconstruction period of lyophilized samples of peptides embedded into DPC micelles. The uncertainties are shown by bars.
